# Supplementary material for: Prevalence of subclinical mastitis in Finnish dairy cows: changes during recent decades and impact of cow and herd factors
Source: PubMed Central journal article supplement (PMC5397772; doi:10.1186/s13028-017-0288-x), 2017-04-20
Supplement: 13028_2017_288_MOESM1_ESM.pdf [file 13028_2017_288_MOESM1_ESM.pdf]

**Additional file 1 Effect of different factors on prevalence of subclinical mastitis (SCM) in Finland in years 2001 and 2010**

|                           | Comparison                  | 99.9 % CL             |       |       | 2001<br>99.9 % CL |       |       | 2010<br>99.9 % CL |       |       |
|---------------------------|-----------------------------|-----------------------|-------|-------|-------------------|-------|-------|-------------------|-------|-------|
|                           |                             | Odds ratio            | Lower | Upper | Odds ratio        | Lower | Upper | Odds ratio        | Lower | Upper |
| Year                      | 2001 vs. 2010               | 1.126                 | 1.099 | 1.153 |                   |       |       |                   |       |       |
| Parity                    | 1 vs. 2                     | 0.746                 | 0.732 | 0.760 | 0.763             | 0.740 | 0.786 | 0.729             | 0.713 | 0.745 |
|                           | 1 vs. 3                     | 0.526                 | 0.516 | 0.537 | 0.566             | 0.548 | 0.584 | 0.490             | 0.478 | 0.501 |
|                           | 1 vs. ≥4                    | 0.392                 | 0.385 | 0.400 | 0.442             | 0.428 | 0.455 | 0.348             | 0.341 | 0.356 |
|                           | 2 vs. 3                     | 0.706                 | 0.692 | 0.719 | 0.742             | 0.719 | 0.765 | 0.671             | 0.657 | 0.686 |
|                           | 2 vs ≥4                     | 0.526                 | 0.517 | 0.535 | 0.579             | 0.562 | 0.596 | 0.478             | 0.468 | 0.488 |
|                           | 3 vs. ≥4                    | 0.745                 | 0.731 | 0.760 | 0.781             | 0.757 | 0.805 | 0.712             | 0.696 | 0.728 |
|                           | Breed                       | Ayrshire vs. Holstein | 0.771 | 0.754 | 0.789             |       |       |                   |       |       |
| Ayrshire vs. Other breeds |                             | 0.892                 | 0.810 | 0.982 |                   |       |       |                   |       |       |
| Holstein vs. Other breeds |                             | 1.157                 | 1.050 | 1.275 |                   |       |       |                   |       |       |
| Herd size                 | Average herd size           | 1.002                 | 1.001 | 1.002 |                   |       |       |                   |       |       |
|                           | Jan - March vs. Apr - June  | 0.900                 | 0.879 | 0.922 |                   |       |       |                   |       |       |
| Season                    | Jan - March vs. July - Sept | 0.694                 | 0.678 | 0.711 |                   |       |       |                   |       |       |
|                           | Jan - March vs. Oct - Dec   | 0.815                 | 0.796 | 0.835 |                   |       |       |                   |       |       |
|                           | Apr - June vs. July - Sept  | 0.771                 | 0.754 | 0.790 |                   |       |       |                   |       |       |
|                           | Apr - June vs. Oct - Dec    | 0.906                 | 0.885 | 0.928 |                   |       |       |                   |       |       |
|                           | July - Sept vs. Oct - Dec   | 1.175                 | 1.147 | 1.202 |                   |       |       |                   |       |       |
| Region                    | Southern vs Western         | 1.025                 | 0.994 | 1.057 |                   |       |       |                   |       |       |
|                           | Southern vs Eastern         | 0.899                 | 0.865 | 0.933 |                   |       |       |                   |       |       |
|                           | Southern vs Northern        | 0.865                 | 0.839 | 0.891 |                   |       |       |                   |       |       |
|                           | Western vs Eastern          | 0.877                 | 0.847 | 0.908 |                   |       |       |                   |       |       |
|                           | Western vs Northern         | 0.844                 | 0.822 | 0.866 |                   |       |       |                   |       |       |
|                           | Eastern vs Northern         | 0.962                 | 0.930 | 0.995 |                   |       |       |                   |       |       |

Mixed effects logistic regression model of SCM and related factors (observations used 1,033,602). SCM was defined as cow composite milk SCC (somatic cell count)  $\geq 200,000$  cells/ml in one test milking of the year. Interactions between years and variables are presented separately in columns. OR (odds ratio), 99.9% CL (confidence limit).
