# Supplementary material for: Prevalence of subclinical mastitis in Finnish dairy cows: changes during recent decades and impact of cow and herd factors
Source: PubMed Central journal article supplement (PMC5397772; doi:10.1186/s13028-017-0288-x), 2017-04-20
Supplement: 13028_2017_288_MOESM2_ESM.pdf [file 13028_2017_288_MOESM2_ESM.pdf]

**Additional file 2 Estimated effects of different factors on cow composite milk SCC (somatic cell count) in Finland in 2001 and 2010**

| Factor             |                         | 99.9% CI |       |       | 2001     |       |       | 2010     |       |       |
|--------------------|-------------------------|----------|-------|-------|----------|-------|-------|----------|-------|-------|
|                    |                         | 99.9% CI |       |       | 99.9% CI |       |       | 99.9% CI |       |       |
|                    |                         | Estimate | Lower | Upper | Estimate | Lower | Upper | Estimate | Lower | Upper |
| Year               |                         |          |       |       | 88.4     | 86.9  | 89.9  | 79.2     | 78.1  | 80.4  |
| Number of parity   | 1                       | 61.2     | 60.4  | 62.1  | 66.1     | 64.9  | 67.4  | 56.7     | 55.9  | 57.6  |
|                    | 2                       | 74.0     | 73.0  | 75.0  | 79.8     | 78.3  | 81.2  | 68.6     | 67.6  | 69.7  |
|                    | 3                       | 95.3     | 94.0  | 96.6  | 100.2    | 98.3  | 102.2 | 90.6     | 89.2  | 92.0  |
|                    | ≥4                      | 113.5    | 112.0 | 115.0 | 115.3    | 113.2 | 117.6 | 111.7    | 109.9 | 113.4 |
| Breed              | Ayrshire                | 76.8     | 76.0  | 77.6  |          |       |       |          |       |       |
|                    | Holstein                | 93.4     | 92.4  | 94.4  |          |       |       |          |       |       |
|                    | Other breeds            | 81.7     | 79.7  | 83.7  |          |       |       |          |       |       |
| Stall-type         | Tie-stall               | 77.2     | 76.2  | 78.1  |          |       |       |          |       |       |
|                    | Free-stall              | 80.3     | 79.3  | 81.4  |          |       |       |          |       |       |
|                    | Free-stall (AMS)        | 94.5     | 93.0  | 95.9  |          |       |       |          |       |       |
| Type of production | Organic                 | 87.5     | 85.7  | 89.3  | 94.2     | 91.4  | 97.2  | 81.2     | 79.2  | 83.4  |
|                    | Conventional production | 80.0     | 79.3  | 80.7  | 82.9     | 82.0  | 83.7  | 77.2     | 76.6  | 77.9  |
| Region             | East                    | 81.2     | 80.1  | 82.2  | 87.0     | 85.4  | 88.6  | 75.7     | 74.5  | 76.9  |
|                    | North                   | 76.8     | 75.8  | 77.8  | 79.7     | 78.2  | 81.1  | 74.1     | 73.0  | 75.2  |
|                    | South                   | 87.0     | 85.8  | 88.3  | 92.0     | 90.2  | 93.9  | 82.3     | 80.9  | 83.7  |
|                    | West                    | 90.3     | 89.2  | 91.5  | 95.6     | 93.9  | 97.4  | 85.3     | 84.1  | 86.6  |

The estimated effects (multivariate ANOVA model) of the different pre-determined factors on composite milk SCC of cows included in the Finnish National health monitoring and milk recording system in 2001 and 2010 (observations used 1,033,602). Interactions between years and variables are presented separately in columns. All the included factors were tested statistically significant with Type III tests for fixed effects.
