# Supplementary material for: Prevalence of subclinical mastitis in Finnish dairy cows: changes during recent decades and impact of cow and herd factors
Source: PubMed Central journal article supplement (PMC5397772; doi:10.1186/s13028-017-0288-x), 2017-04-20
Supplement: 13028_2017_288_MOESM3_ESM.pdf [file 13028_2017_288_MOESM3_ESM.pdf]

**Additional file 3 Estimated effects of different factors on herd milk SCC (somatic cell count) in Finland in 2001 and 2010**

| Comparison                      | Estimate | 99.9% CI |       | P-value |
|---------------------------------|----------|----------|-------|---------|
|                                 |          | Lower    | Upper |         |
| 2001 vs. 2010                   | 1.274    | 1.085    | 1.497 | <.001   |
| Average parity of the herd      | 0.965    | 0.941    | 0.989 | <.001   |
| Herd milk yield (100 kg)        | 0.991    | 0.990    | 0.992 | <.001   |
| Herd milk yield (100 kg, 2001)  | 0.989    | 0.987    | 0.990 | <.001   |
| Herd milk yield (100 kg, 2010)  | 0.993    | 0.991    | 0.994 | <.001   |
| Average herd size               | 1.005    | 1.004    | 1.006 | <.001   |
| Average herd size (2001)        | 1.007    | 1.005    | 1.009 | <.001   |
| Average herd size (2010)        | 1.003    | 1.002    | 1.004 | <.001   |
| Free-stall (AMS) vs. Free-stall | 1.138    | 1.052    | 1.231 | <.001   |
| Free-stall (AMS) vs. Tie-stall  | 1.181    | 1.090    | 1.280 | <.001   |
| Free-stall vs. Tie-stall        | 1.038    | 0.998    | 1.079 | 0.014   |
| South vs. West                  | 1.002    | 0.963    | 1.042 | 0.909   |
| South vs. North                 | 1.092    | 1.046    | 1.139 | <.001   |
| South vs. East                  | 1.106    | 1.063    | 1.151 | <.001   |
| West vs. North                  | 1.090    | 1.055    | 1.126 | <.001   |
| West vs. East                   | 1.104    | 1.072    | 1.137 | <.001   |
| North vs. East                  | 1.013    | 0.981    | 1.046 | 0.301   |

The estimated effects (multivariate ANOVA model) of the different pre-determined factors on the average milk SCC of herds included in the Finnish National health monitoring and milk recording system in 2001 and 2010 (observations used 11,991). Interactions between years and variables are presented on separate lines. All the included factors were tested statistically significant with Type III tests for fixed effects. For detailed description of variables please see Table 1.
